# Supplementary material for: Traditional and Unconventional Dried Fruit Snacks as a Source of Health-Promoting Compounds
Source: PubMed Central journal article supplement (PMC6770932; doi:10.3390/antiox8090396), 2019-09-13
Supplement: antioxidants-08-00396-s001.pdf [file antioxidants-08-00396-s001.pdf]

**Table S1.** Protocols for the extraction of bioactive compounds and nutritional substances.

| Chemical class                          | Sample Weight | Extraction Solvents                                                                                        | Time of Extraction | Homogenisation | Centrifugation      | Number of Successive Extraction | Other Actions                                                                                      |
|-----------------------------------------|---------------|------------------------------------------------------------------------------------------------------------|--------------------|----------------|---------------------|---------------------------------|----------------------------------------------------------------------------------------------------|
| Polyphenolic compounds                  | 10 g          | methanol : bi-distilled water, 95:5 v/v, pH adjusted with 1.5 mL of 37% HCl (25 mL)                        | 60 min in the dark | 1 min          | 15 min at 3,000 rpm | 3                               | /                                                                                                  |
| Organic acids, sugars, and monoterpenes | 5 g           | 95% ethanol (25 mL)                                                                                        | 30 min in the dark | 1 min          | 10 min at 4,000 rpm | 2                               | /                                                                                                  |
| Vitamin C                               | 5 g           | 0.1 M citric acid, 2 mM EDTA disodium salt, and 4 mM sodium fluoride in methanol – water, 5:95 v/v (10 mL) | 20 min in the dark | 1 min          | 10 min at 4,000 rpm | 2                               | Supernatant acidified with 4 N HCl (pH = 2.2–2.4 ) and centrifuged for 5 min at 12,000 rpm at 4 °C |
| Carotenoids                             | 5 g           | methanol : tert-butyl methyl ether, 70:30 v/v (35 mL)                                                      | 30 min in the dark | 1 min          | 15 min at 4,000 rpm | 2                               | /                                                                                                  |

**Table S2.** Chromatographic conditions of the used HPLC methods.

| Method | Classes of Interest       | Stationary Phase                                          | Mobile Phase                                                                                                                                          | Wavelength (nm) |
|--------|---------------------------|-----------------------------------------------------------|-------------------------------------------------------------------------------------------------------------------------------------------------------|-----------------|
| A      | cinnamic acids, flavonols | KINETEX – C18 column (4.6 × 150 mm, 5 μm)                 | A: 10 mM KH <sub>2</sub> PO <sub>4</sub> /H <sub>3</sub> PO <sub>4</sub> , pH = 2.8<br>B: CH <sub>3</sub> CN                                          | 330             |
| B      | benzoic acids, catechins  | KINETEX – C18 column (4.6 × 150 mm, 5 μm)                 | A: H <sub>2</sub> O/CH <sub>3</sub> OH/HCOOH (5:95:0.1 v/v/v), pH = 2.5<br>B: CH <sub>3</sub> OH/HCOOH (100:0.1 v/v)                                  | 280             |
| C      | monoterpenes              | KINETEX – C18 column (4.6 × 150 mm, 5 μm)                 | A: H <sub>2</sub> O<br>B: CH <sub>3</sub> CN                                                                                                          | 250             |
| D      | organic acids             | KINETEX – C18 column (4.6 × 150 mm, 5 μm)                 | A: 10 mM KH <sub>2</sub> PO <sub>4</sub> /H <sub>3</sub> PO <sub>4</sub> , pH = 2.8<br>B: CH <sub>3</sub> CN                                          | 214             |
| E      | vitamins                  | KINETEX – C18 column (4.6 × 150 mm, 5 μm)                 | A: 5 mM C <sub>16</sub> H <sub>33</sub> N(CH <sub>3</sub> ) <sub>3</sub> Br/50 mM KH <sub>2</sub> PO <sub>4</sub> , pH = 2.5<br>B: CH <sub>3</sub> OH | 261, 348        |
| F      | sugars                    | SphereClone – NH <sub>2</sub> column (4.6 × 250 mm, 5 μm) | A: H <sub>2</sub> O<br>B: CH <sub>3</sub> CN                                                                                                          | 267, 286        |
| G      | carotenoids               | KINETEX – C18 column (4.6 × 150 mm, 5 μm)                 | A: ACN<br>B: CH <sub>3</sub> OH<br>C: CH <sub>2</sub> Cl <sub>2</sub>                                                                                 | 450             |

*Elution conditions*

Method A, gradient analysis: 5%B to 21%B in 17 min + 21%B in 3 min (2 min conditioning time); flow: 1.5 mL min<sup>-1</sup>

Method B, gradient analysis: 3%B to 85%B in 22 min + 85%B in 1 min (2 min conditioning time); flow: 0.6 mL min<sup>-1</sup>

Method C, gradient analysis: 30%B to 56%B in 15 min + 56%B in 2 min (3 min conditioning); flow: 1.0 mL min<sup>-1</sup>

Method D, gradient analysis: 5%B to 14%B in 10 min + 14%B in 3 min (2 min conditioning time); flow: 0.6 mL min<sup>-1</sup>

Method E, isocratic analysis: ratio of phase A and B: 95:5 in 10 min (5 min conditioning time); flow: 0.9 mL min<sup>-1</sup>

Method F, isocratic analysis: ratio of phase A and B: 5:85 in 12 min (3 min conditioning time); flow: 0.5 mL min<sup>-1</sup>

Method G, isocratic analysis: ratio of phase A, B and C: 75:20:5 in 20 min (5 min conditioning time); flow: 1.0 mL min<sup>-1</sup>

Table S3. Phytocomplex of considered dried fruits.

| ID | Polyphenols<br>(mg/100 g DW)  | Monoterpenes<br>(mg/100 g DW) | Carotenoids<br>(µg/g DW)   | Vitamin C<br>(mg/100 g DW) | Organic Acids<br>(mg/100 g DW) | Sugars<br>(g/100 g DW)     |
|----|-------------------------------|-------------------------------|----------------------------|----------------------------|--------------------------------|----------------------------|
| AG | 1364.07 ± 18.24 <sup>d</sup>  | 348.03 ± 44.10 <sup>c</sup>   | 9.10 ± 1.29 <sup>a</sup>   | 8.33 ± 2.98 <sup>a</sup>   | 763.11 ± 256.73 <sup>c</sup>   | 83.24 ± 8.19 <sup>d</sup>  |
| AC | 1222.28 ± 102.67 <sup>d</sup> | 376.04 ± 34.85 <sup>c</sup>   | 9.80 ± 1.69 <sup>a</sup>   | 14.98 ± 1.81 <sup>ab</sup> | 814.16 ± 188.95 <sup>c</sup>   | 71.28 ± 5.82 <sup>cd</sup> |
| KH | 153.71 ± 6.40 <sup>b</sup>    | 2.12 ± 0.57 <sup>a</sup>      | 24.64 ± 1.62 <sup>b</sup>  | 49.85 ± 0.49 <sup>c</sup>  | 1863.80 ± 3.01 <sup>d</sup>    | 8.67 ± 1.27 <sup>a</sup>   |
| CF | 310.03 ± 6.63 <sup>c</sup>    | 4.21 ± 0.89 <sup>a</sup>      | 63.11 ± 2.08 <sup>c</sup>  | 17.58 ± 0.98 <sup>b</sup>  | 210.13 ± 2.33 <sup>a</sup>     | 15.26 ± 1.26 <sup>b</sup>  |
| GS | 28.27 ± 2.53 <sup>a</sup>     | 295.13 ± 13.15 <sup>b</sup>   | 937.58 ± 4.18 <sup>d</sup> | 104.58 ± 3.65 <sup>d</sup> | 294.82 ± 2.89 <sup>b</sup>     | 43.99 ± 2.67 <sup>c</sup>  |

Data ( $n = 3$ ) are shown as mean value ± standard deviation (SD). Significant statistical differences ( $p < 0.05$ ) are highlighted by different letters (a-d). AG = *Malus domestica* Borkh., 'Golden Delicious'; AC = *Malus domestica* Borkh., 'Camela'; KH = *Actinidia deliciosa* (A.Chev.) C.F.Liang and A.R.Ferguson, 'Hayword'; CF = *Diospyros kaki* L.F., 'Fuyu'; GS = *Lycium barbarum* L., 'Sweet'. DW = dried weight.
